# Supplementary material
Source: Springer Nature journal article supplement (https://www.springermedizin.de/resource/supplementary/12913_2006_432_MOESM3_ESM.pdf/9535196)
Supplement: MOESM3 [file 9535196]

### Additional File 3 Studies that indirectly correlate process with outcome

| First author and date of publication | Setting of study                                                                                                                               | Nature or medical condition(s) of patients                                       | How quality of care was measured                                                                                         | How risk-adjusted mortality was measured                                                                        | Principal findings                                                                                                                                                                                                                                                                                                                                                                                                                                                                                              | Nature of relationship                                                         | Additional comments                                                                                                                                                                                                                             |
|--------------------------------------|------------------------------------------------------------------------------------------------------------------------------------------------|----------------------------------------------------------------------------------|--------------------------------------------------------------------------------------------------------------------------|-----------------------------------------------------------------------------------------------------------------|-----------------------------------------------------------------------------------------------------------------------------------------------------------------------------------------------------------------------------------------------------------------------------------------------------------------------------------------------------------------------------------------------------------------------------------------------------------------------------------------------------------------|--------------------------------------------------------------------------------|-------------------------------------------------------------------------------------------------------------------------------------------------------------------------------------------------------------------------------------------------|
| Allison [64] 2000                    | 4,361 US hospitals (major and minor teaching, and non-teaching)                                                                                | 114,411 AMI patients over 65 years old in Co-operative Cardiovascular Project    | Reperfusion therapy, aspirin, angiotensin-converting enzyme inhibitor (ACEI) at discharge, $\beta$ -blocker at discharge | 30, 60, 90 day and two years after AMI; calculated from clinical data, predictive power assessed by c-statistic | Aggregating hospitals by major, minor and non-teaching status, adherence to processes fell across the three categories and mortality increased                                                                                                                                                                                                                                                                                                                                                                  | Intuitive                                                                      | CCP indicators may have overlooked patients with less strong indications for therapy                                                                                                                                                            |
| Baldwin [65] 2004                    | 4,085 US hospitals (small and large rural, and urban)                                                                                          | 135,759 AMI patients over 65 years old in Co-operative Cardiovascular Project    | Adherence to all relevant American College of Cardiologist/American Heart Association guidelines                         | 30-day mortality; calculated from clinical data, predictive power not assessed                                  | Adherence to processes increased across different categories of hospitals - remote rural, small rural, large rural and urban, and mortality fell across the four groups. However, despite patients on average being less likely to receive recommended treatments in more rural hospitals, the same proportion of hospitals in each category had almost complete adherence to process guidelines.                                                                                                               | Intuitive                                                                      |                                                                                                                                                                                                                                                 |
| Chen (1) [66] 1999                   | 4,672 US hospitals comparing the 60 highest ranked in "America's Best Hospitals" rating scheme to similarly well-equipped hospitals and others | 149,177 AMI patients over 65 years old in Co-operative Cardiovascular Project    | Use of aspirin, $\beta$ -blockers and reperfusion                                                                        | 30-day mortality; calculated from clinical data, predictive power not assessed                                  | Within categories of similar hospitals, mortality varied so widely that many "non-top-ranked" hospitals had lower mortality than the median mortality of the "top-ranked" hospitals'. Significantly more eligible patients were prescribed aspirin or $\beta$ -blockers in "top-ranked" hospitals, but reperfusion thrombolysis was underutilised. Overall mortality was significantly lower in the 60 "top-ranked" hospitals than similar hospitals not in the "top 60".                                       | Intuitive for aspirin and $\beta$ -blockers; paradoxical thrombolysis          | Mortality measured all cardiovascular deaths, not just AMI. "Best" hospitals were selected not just by mortality but by reputation in the opinion of specialist physicians                                                                      |
| Chen (2) [67] 1999                   | 4,672 US hospitals compared those in "100 top hospitals" rating scheme against all others. Same database as Chen (1) above                     | 149,177 AMI patients over 65 years old in Co-operative Cardiovascular Project    | Use of aspirin, $\beta$ -blockers and reperfusion                                                                        | 30-day mortality; calculated from clinical data, predictive power not assessed                                  | Proportion of eligible patients receiving aspirin and $\beta$ -blockers similar between "top 100 hospitals" and other hospitals. Mortality not significantly different between "top 100" hospitals and others.                                                                                                                                                                                                                                                                                                  | None                                                                           |                                                                                                                                                                                                                                                 |
| Chen (3) [68] 2003                   | 4,221 US hospitals by level of Joint Commission on Accreditation of Healthcare Organisations (JCAHO) accreditation                             | 134,579 AMI patients over 65 years old in Co-operative Cardiovascular Project    | Use of aspirin, $\beta$ -blockers and reperfusion                                                                        | 30-day mortality; calculated from clinical data, predictive power not assessed                                  | Lower proportion of patients admitted to hospitals not surveyed by JCAHO received aspirin, $\beta$ -blockers or reperfusion and these hospitals had higher than average mortality. Among surveyed hospitals, similar aspirin prescribing regardless of accreditation grade; higher prescribing of $\beta$ -blockers and reperfusion in better-graded hospitals and lower mortality than overall but differences were modest and within each accreditation level were wide variations in processes and outcomes. | Intuitive between groups, none within groups                                   | JCAHO grading more dependent on managerial factors than clinical<br>Recognised subjectivity in grading a hospital                                                                                                                               |
| Gottwik [69] 2001                    | 91 hospitals with cardiology departments and 214 hospitals without cardiology departments in Germany                                           | 24,814 AMI patients                                                              | Use of aspirin, $\beta$ -blockers, ACEIs, statins and reperfusion                                                        | In-hospital mortality; calculated from clinical data                                                            | Reperfusion therapy was used significantly more often in hospitals with cardiology departments, mainly comprising a greater use of primary angioplasty. Hospitals with cardiology departments prescribed aspirin, $\beta$ -blockers, angiotensin-converting enzyme inhibitors and statins significantly more frequently and had a lower mortality                                                                                                                                                               | Intuitive                                                                      |                                                                                                                                                                                                                                                 |
| Keeler [70] 1993                     | 297 hospitals in five US states (Health Care Financing Administration (HCFA) study)                                                            | 14,008 patients with CCF, pneumonia, AMI, cerebrovascular disease, hip fracture  | (1) Explicit review<br>(2) Implicit review                                                                               | 30-day mortality; calculated from clinical data; predictive power not assessed                                  | Above-average explicit process correlated with above-average implicit process and below-average mortality and vice versa for most hospitals. Overall, teaching hospitals had higher quality scores and lower mortality than rural hospitals. Hospitals with lower process scores had higher mortality, but sample sizes too small to differentiate between individual good and bad hospitals. Results not analysed by disease category.                                                                         | Intuitive                                                                      | Investigators aware of which patients died in hospital. Small sample sizes in individual units (5 patients with each condition). Teaching hospitals may have ordered more investigations and recorded more co-morbidities than rural hospitals. |
| Krumholz [71] 2002                   | 3,363 US hospitals; evaluation of internet rating system which classified hospitals by mortality                                               | 141,914 AMI patients in Co-operative Cardiovascular Project                      | Use of reperfusion, aspirin, $\beta$ -blockers, ACEIs                                                                    | 30-day mortality; ; calculated from clinical data; predictive power not assessed                                | Lower mortality associated with hospitals with higher prescribing of aspirin and $\beta$ -blockers. No trend for ACE-inhibitors. Reperfusion more likely in average or above average mortality hospitals than hospitals with significantly lower than average mortality.                                                                                                                                                                                                                                        | Intuitive for some, none or paradoxical for others in group, none individually | Authors' recalculation of mortality based on partially different timeframe to that of original ratings. Method of risk-adjustment to calculate mortality in star ratings not published by ratings company                                       |
| Metnitz [72] 2003                    | 31 Austrian ICUs                                                                                                                               | 26,186 intensive care patients aged over 18                                      | Procedures on the Simplified Therapeutic Intervention Scoring System (TISS-28)                                           | In-hospital mortality; calculated from clinical data; predictive power not assessed                             | Despite greater use of therapeutic interventions than other types of hospitals, teaching hospitals had a significantly higher mortality rate than other types of hospitals                                                                                                                                                                                                                                                                                                                                      | Paradoxical                                                                    |                                                                                                                                                                                                                                                 |
| Pollack [73] 1991                    | 463 children in 74 hospitals with paediatric intensive care units in Oregon and Washington, USA                                                | Children under 18 years old with head trauma or receiving mechanical ventilation | Processes measured by the Therapeutic Intervention Scoring System (TISS)                                                 | Not explicit; calculated from clinical data                                                                     | Tertiary hospitals had significantly higher TISS scores and significantly lower mortality than other hospitals                                                                                                                                                                                                                                                                                                                                                                                                  | Intuitive                                                                      | Definition of mortality not stated, but presumably is ICU mortality                                                                                                                                                                             |
| Ventakappa [74] 2003                 | 13 hospitals in Oklahoma                                                                                                                       | 3,238 CABG patients                                                              | Aspirin at discharge; use of internal mammary artery; duration of intubation after CABG                                  | In-hospital and 30-day mortality; calculated from clinical data; predictive power assessed by ROC               | Widespread differences between hospitals in adherence to processes of care but only one hospital had significantly higher mortality yet scored significantly better on one of the process indicators. When stratified by volume, hospitals with the lowest mortality had the poorest score on two process indicators.                                                                                                                                                                                           | None or paradoxical                                                            | No attempt to correlate process with outcome at the level of individual units, although results of individual units were presented                                                                                                              |
